# Supplementary material
Source: PubMed Central journal article supplement (PMC9549529)

# Supplementary Figure 1

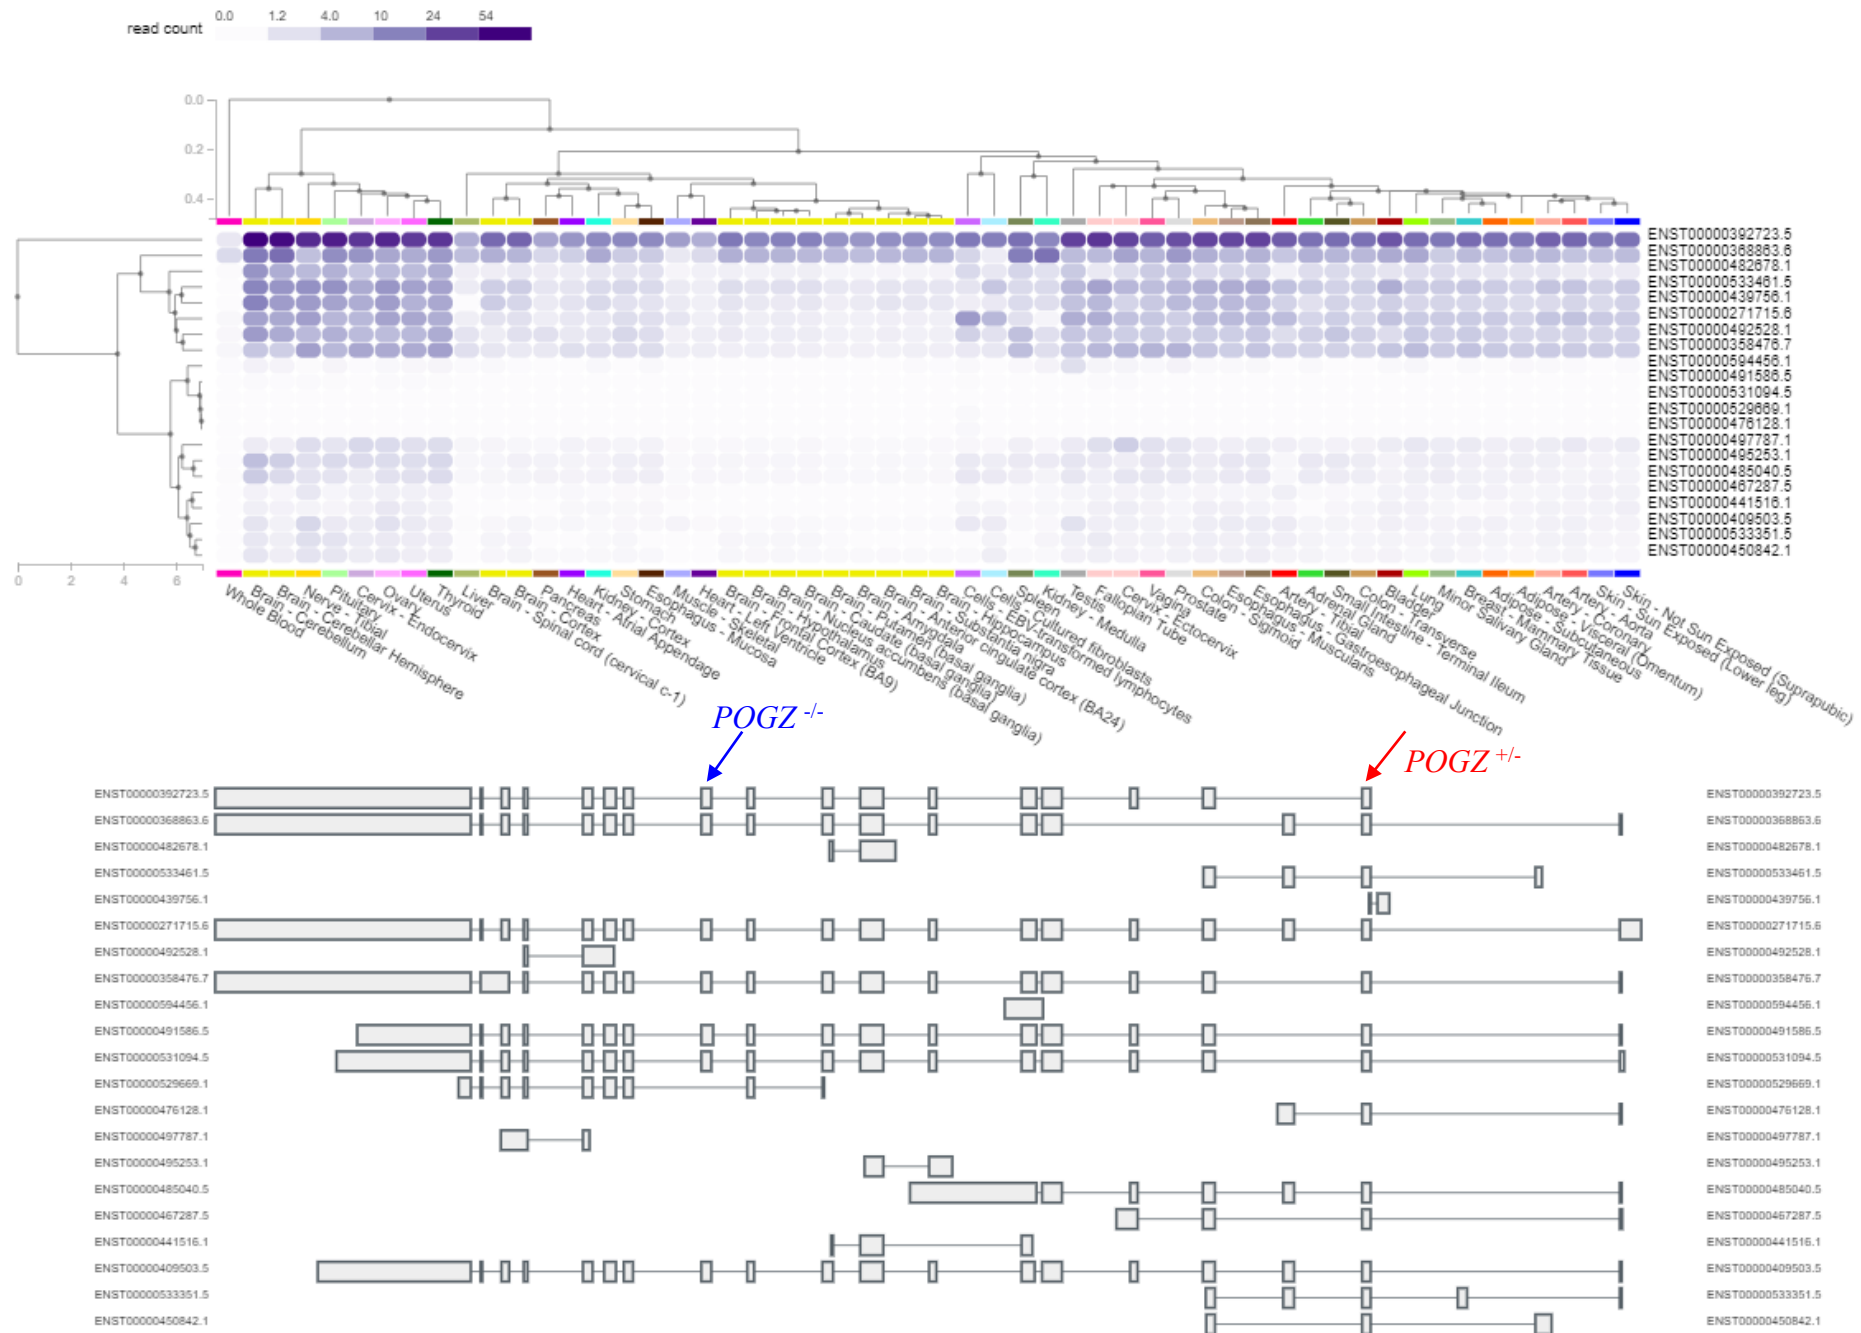

## Supplementary Figure 2

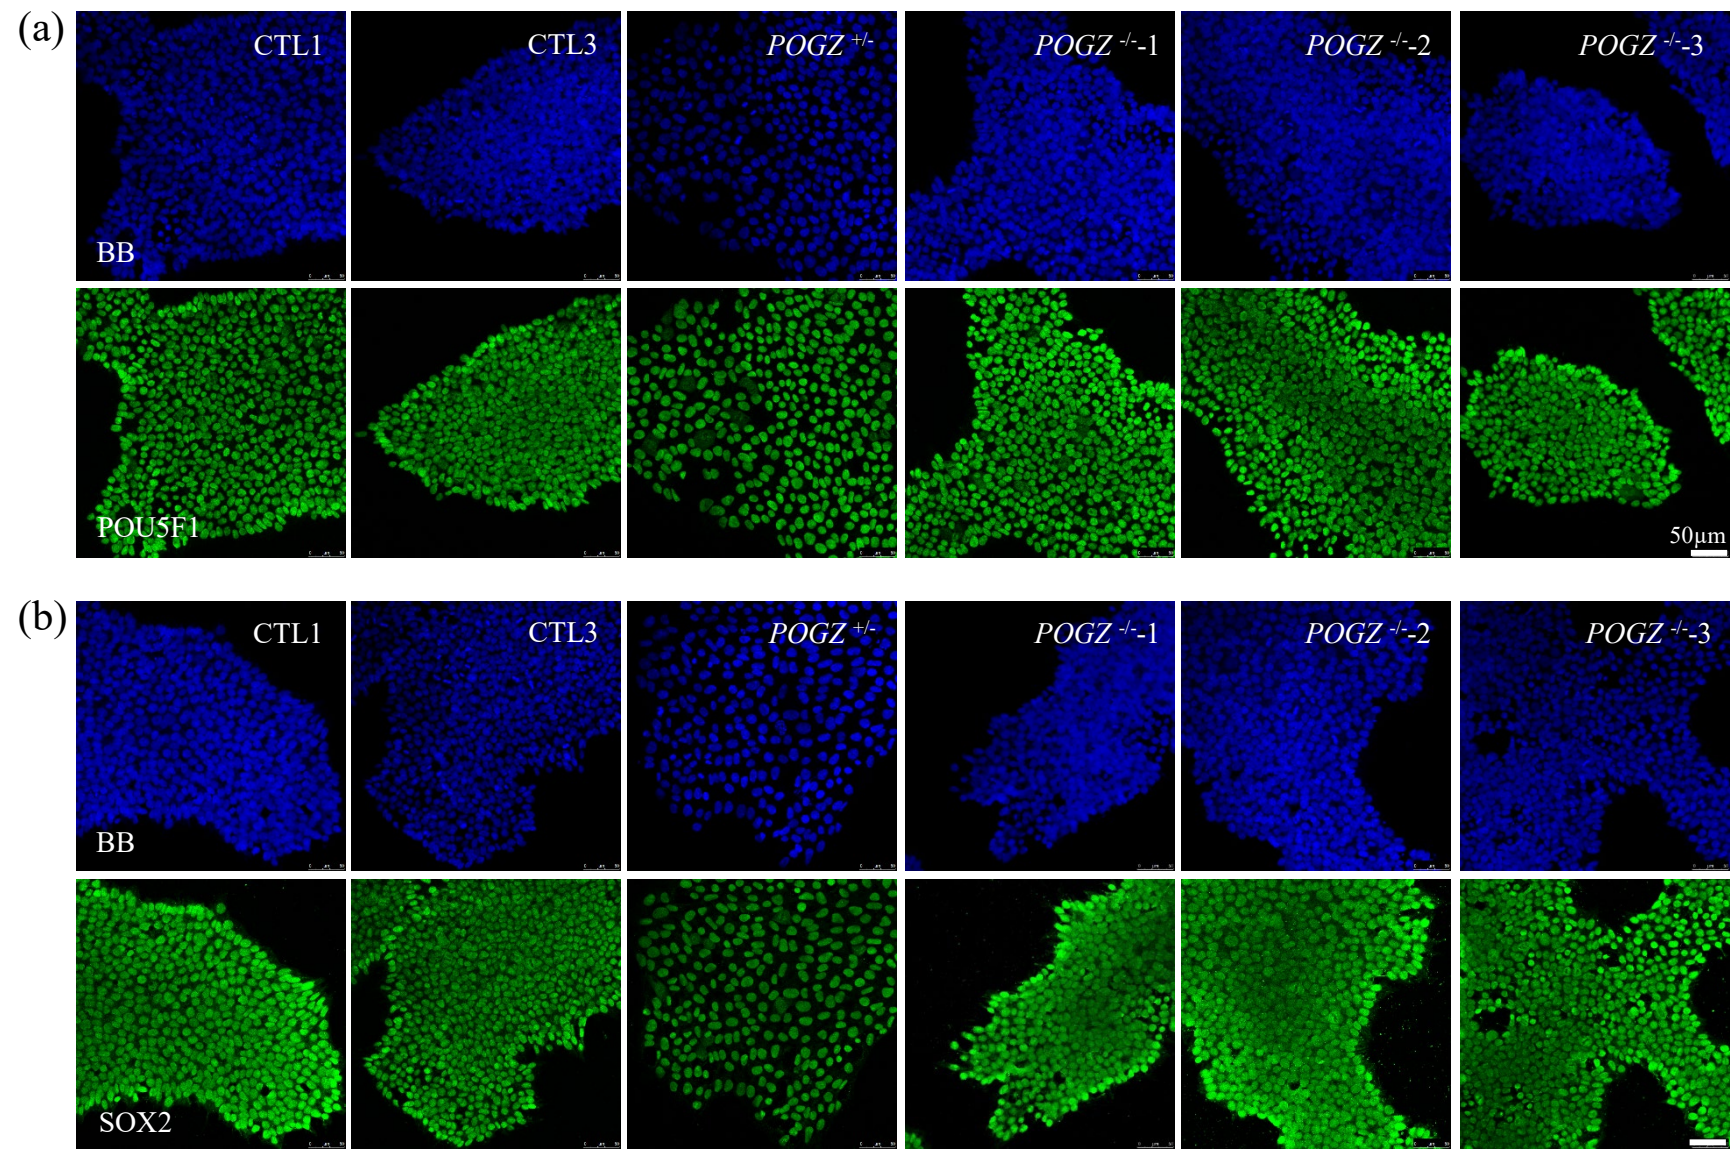



## Supplementary Figure 2

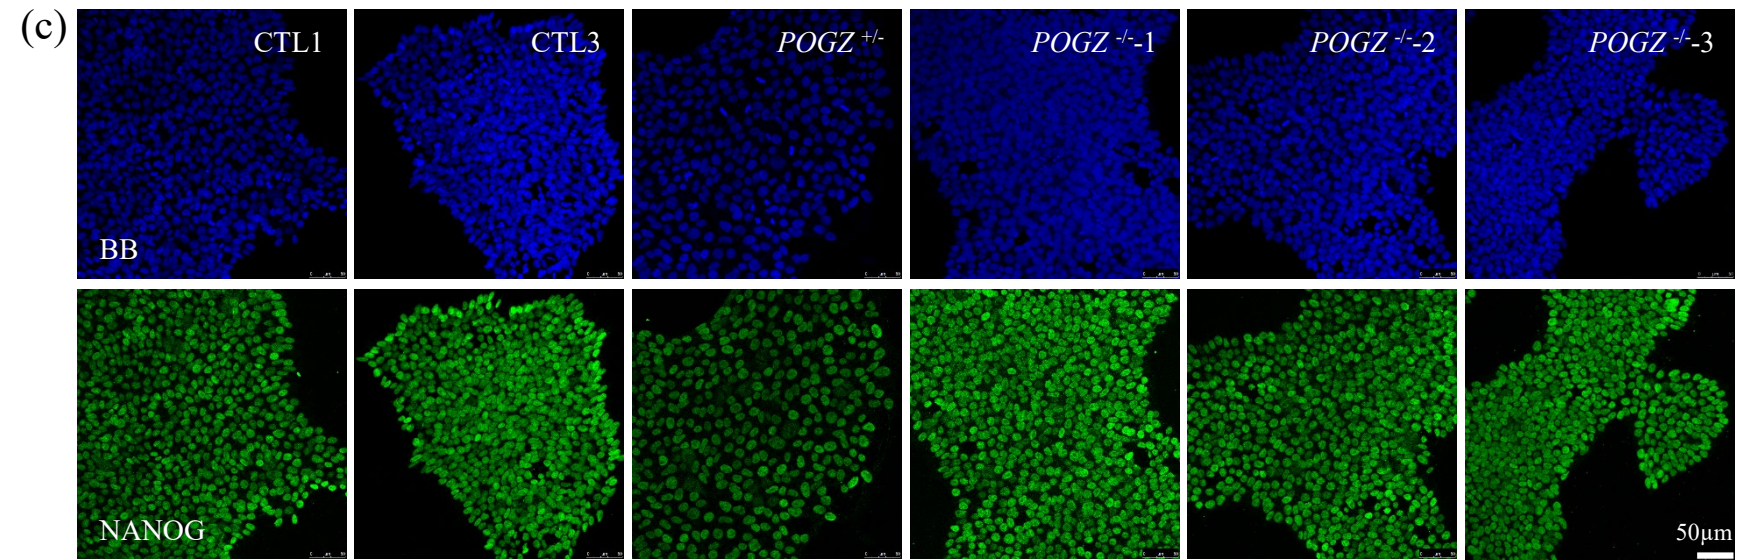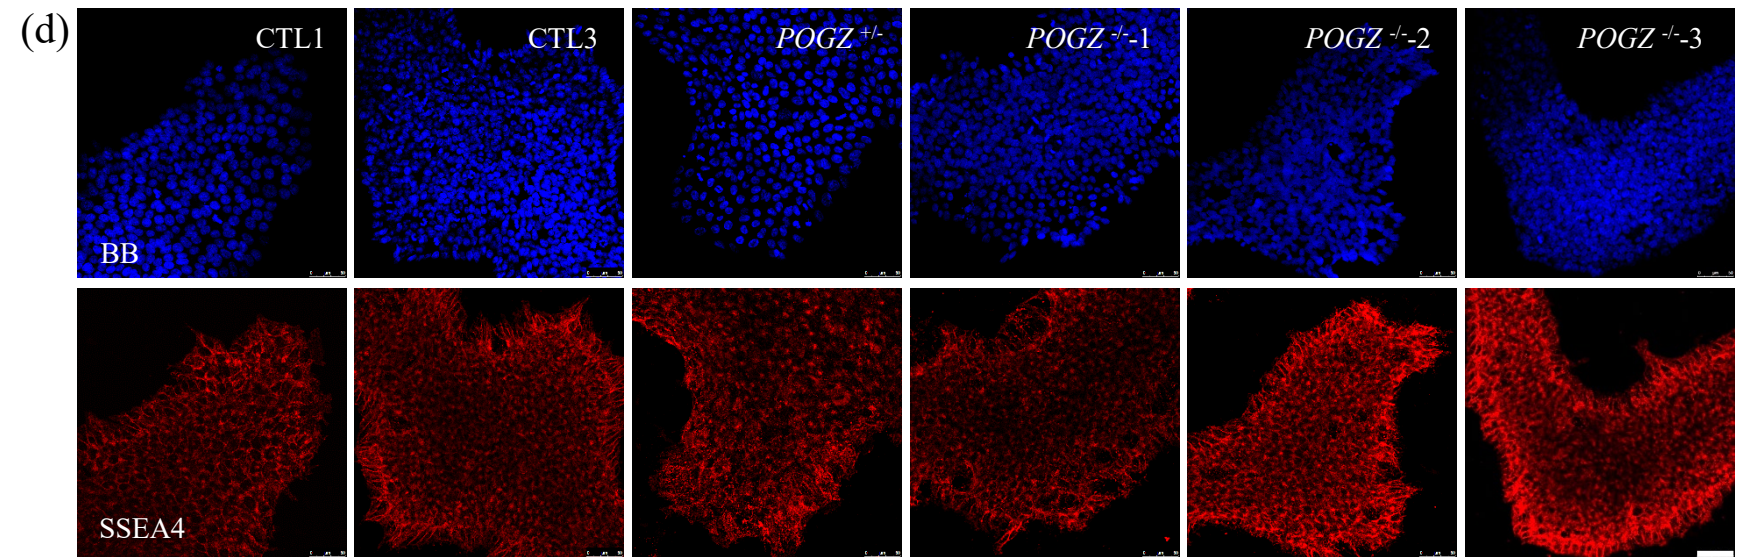

### Supplementary Figure 3

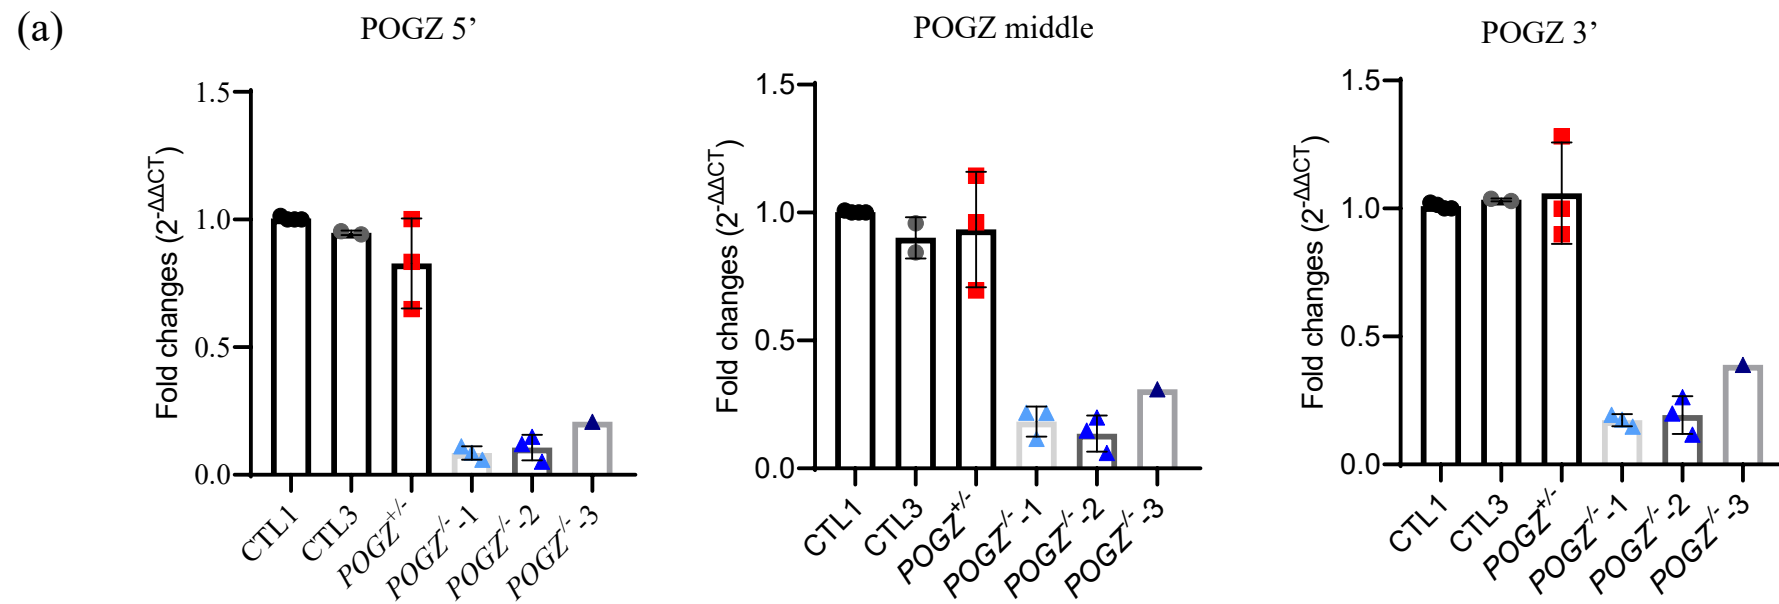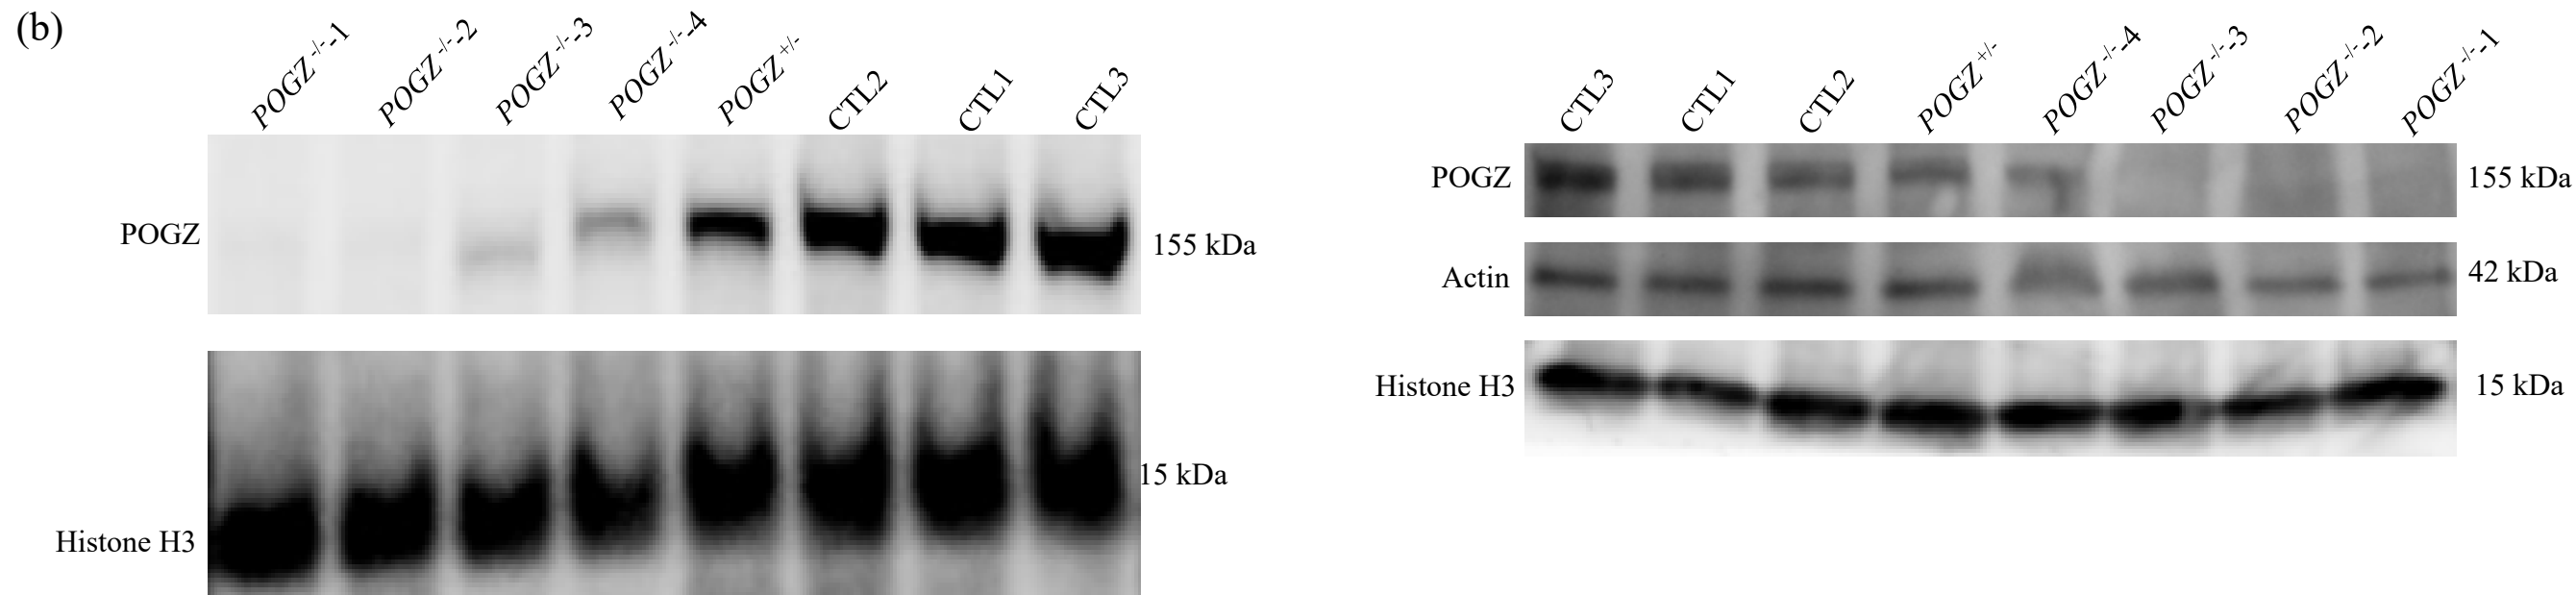

Supplementary Figure 4

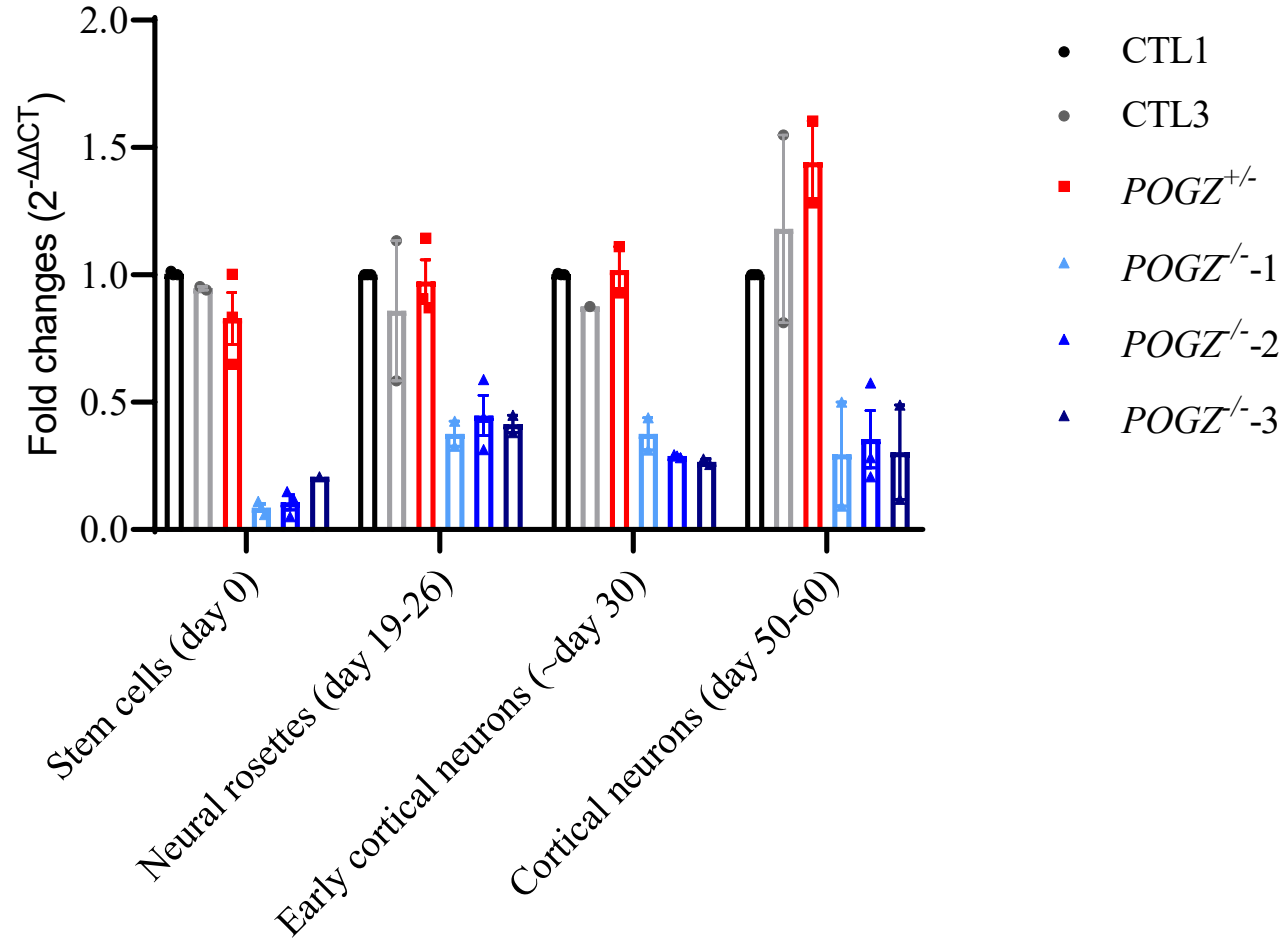

Supplementary Figure 5

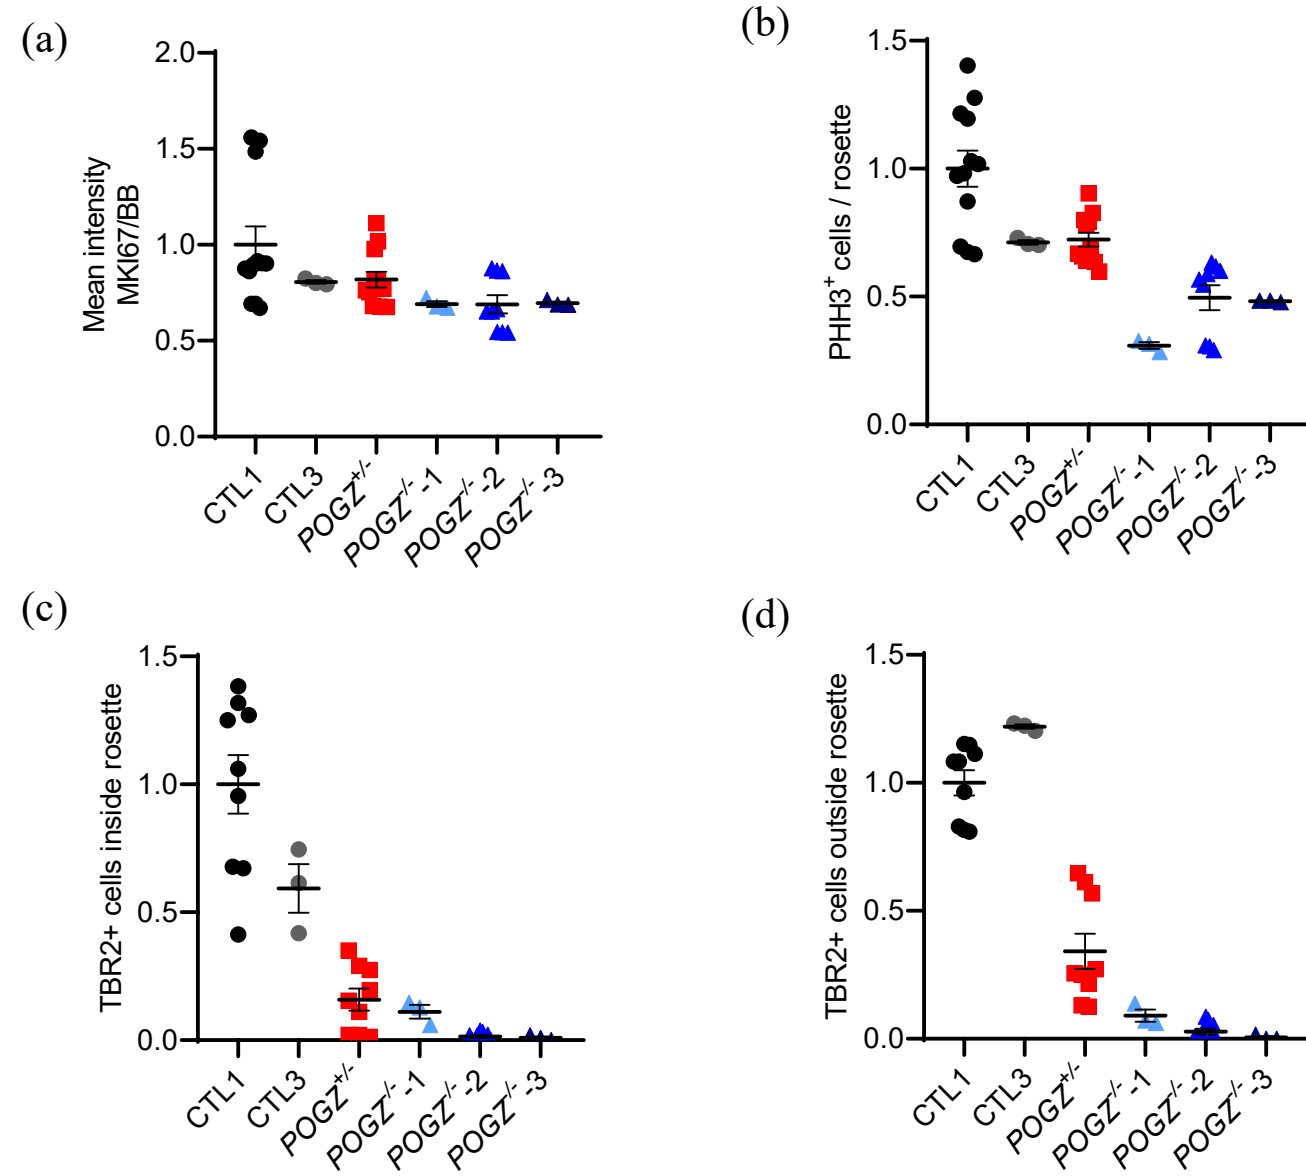



Supplementary Figure 6

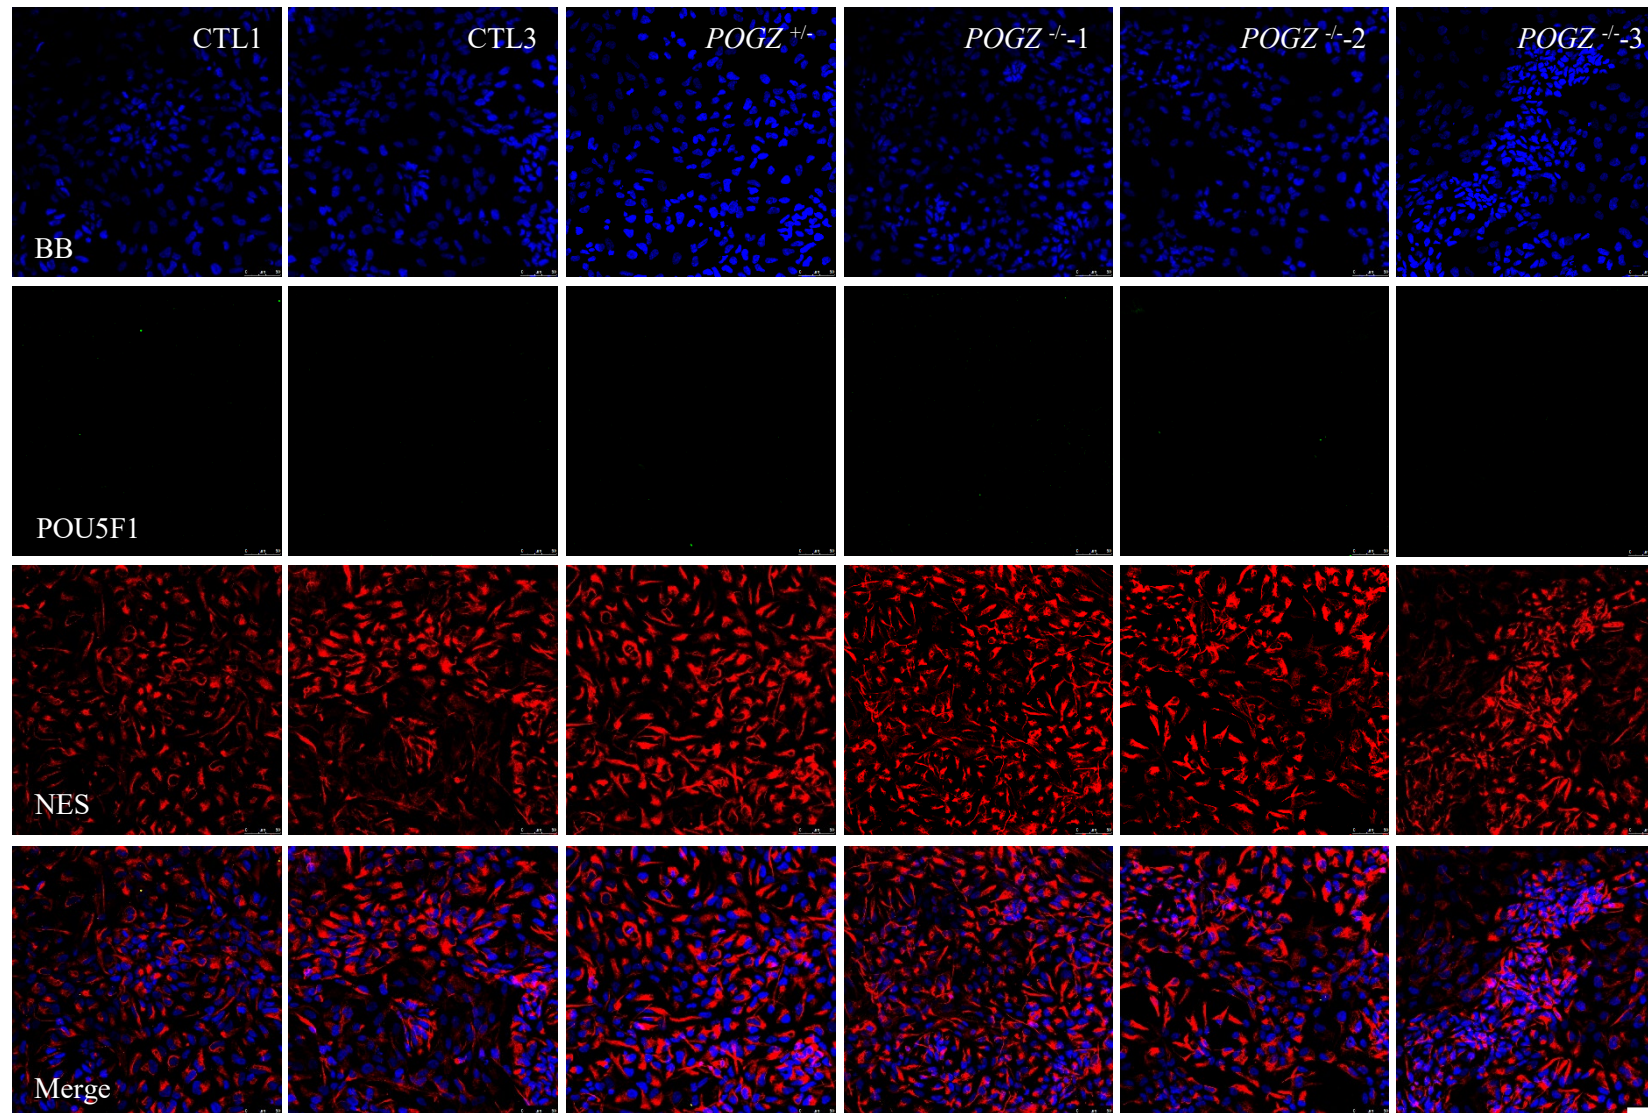

# Supplementary Figure 7

(a)

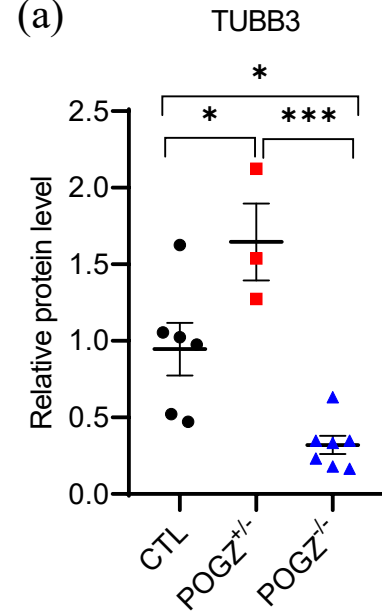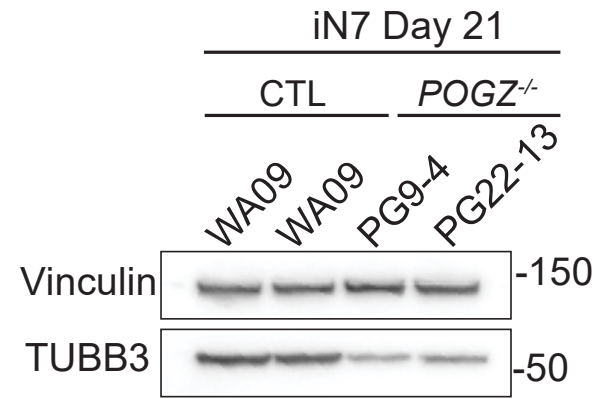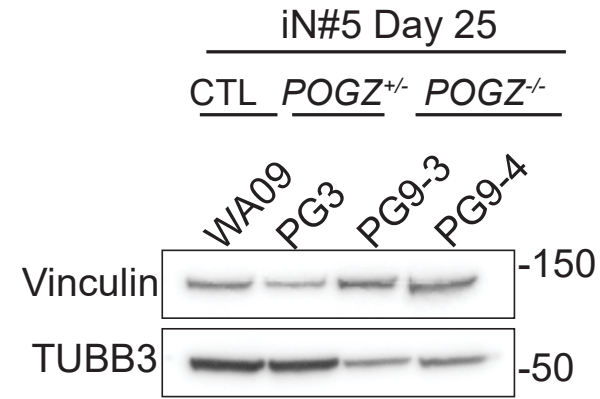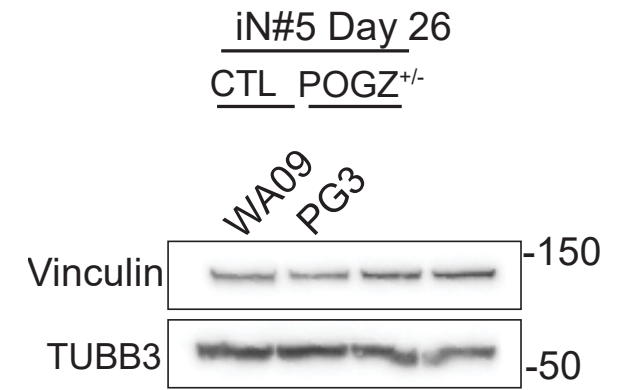

(b)

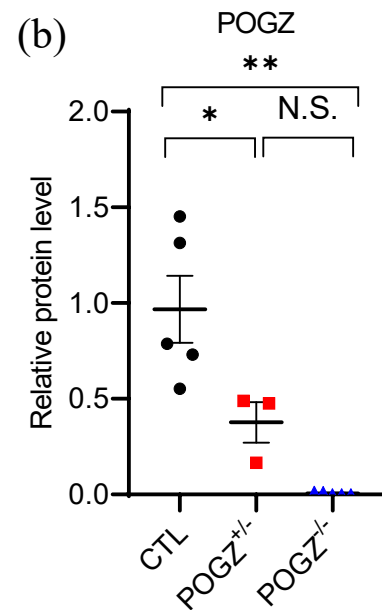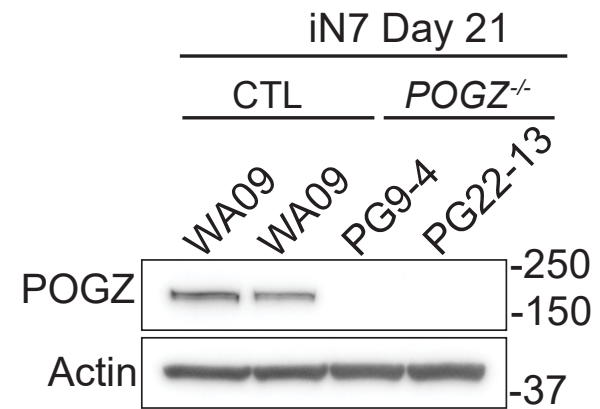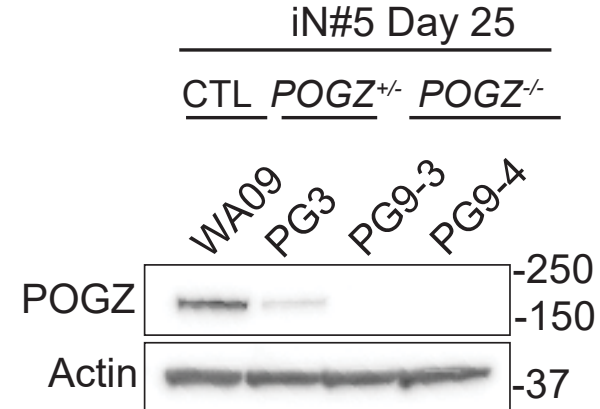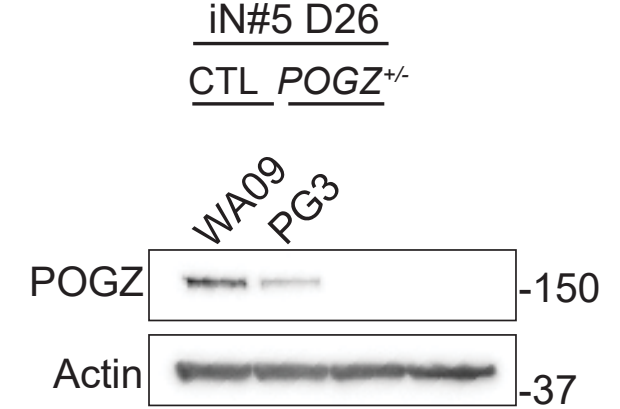



# Supplementary Figure 8

Day 15

Day 20

Day 21

Day 22

Day 23

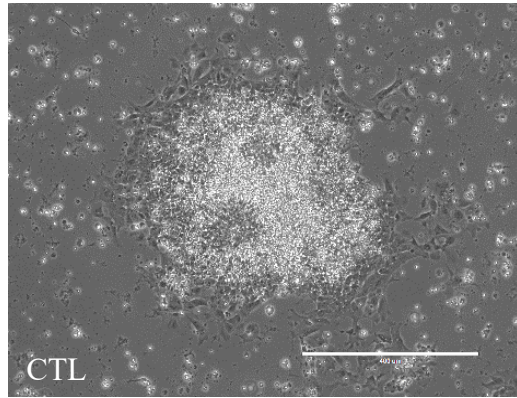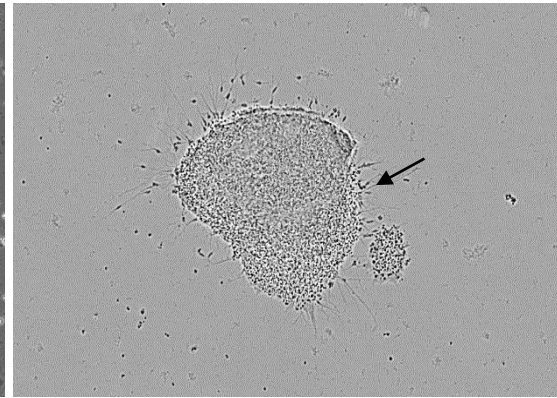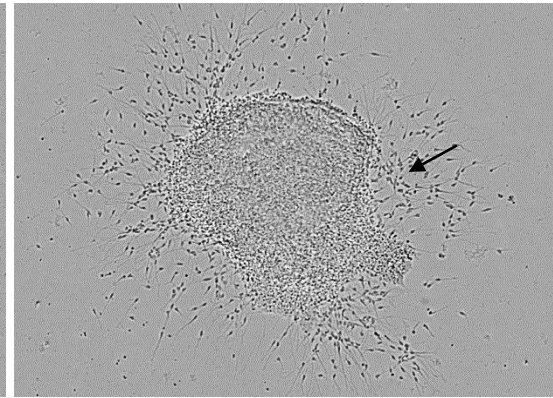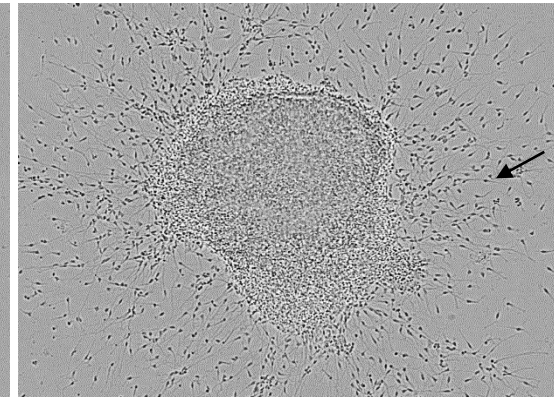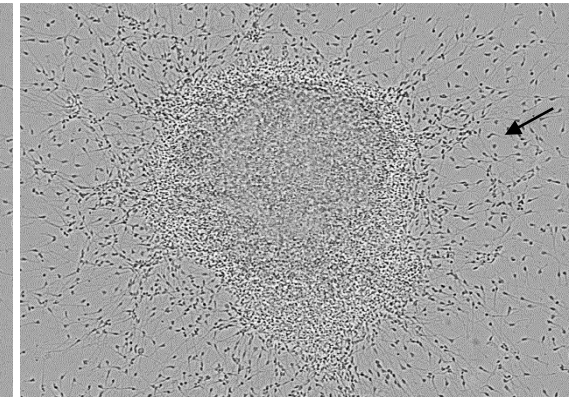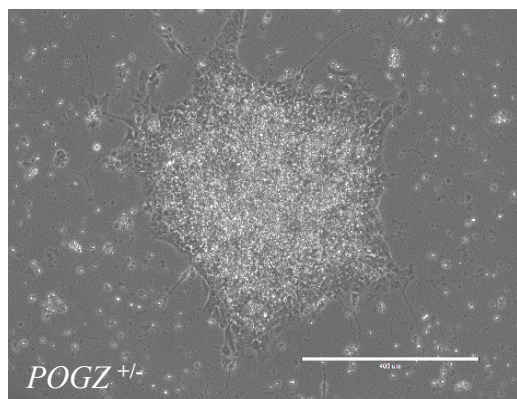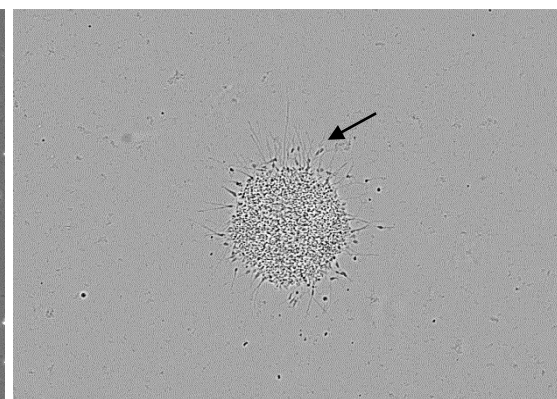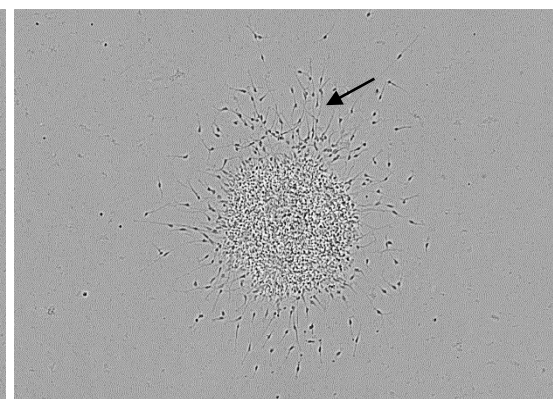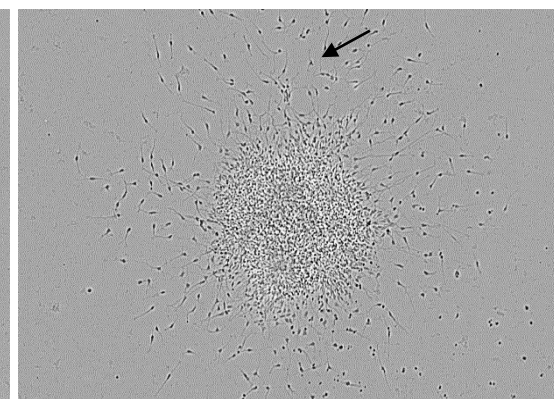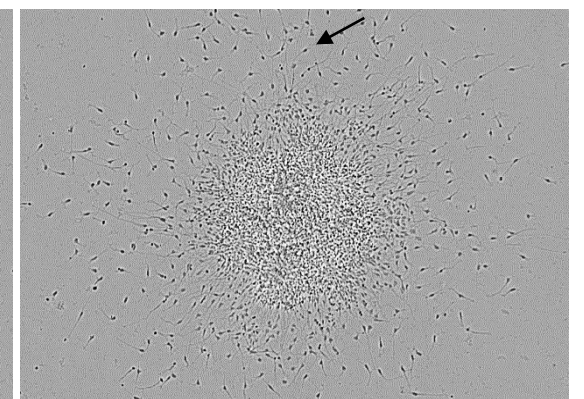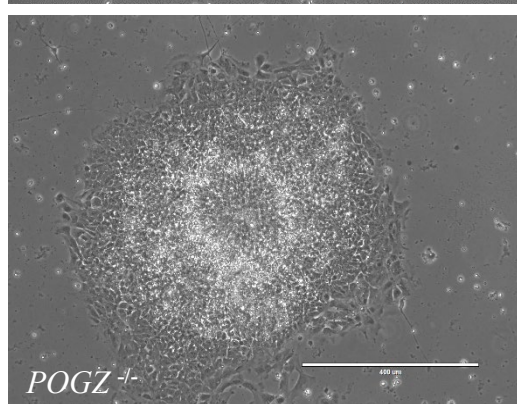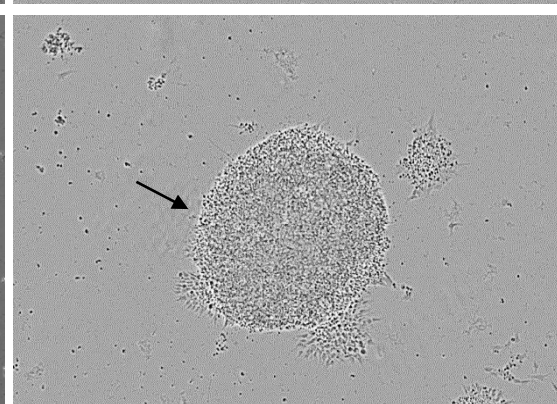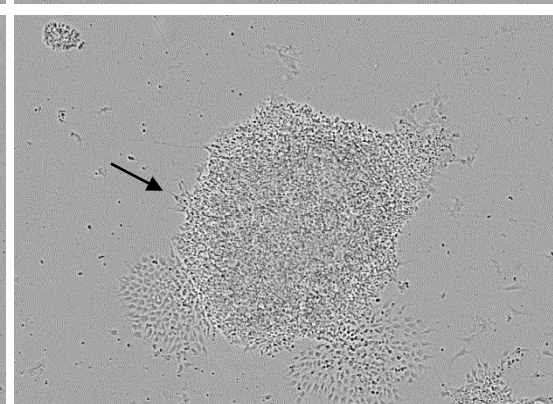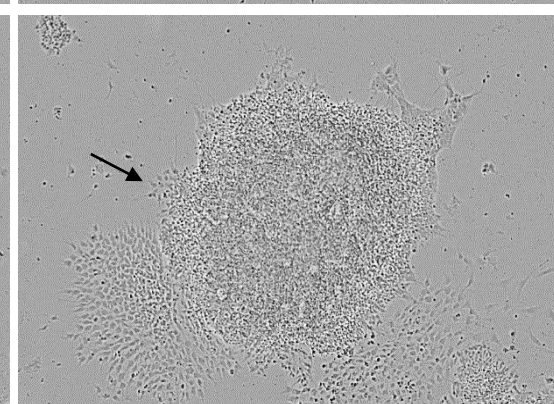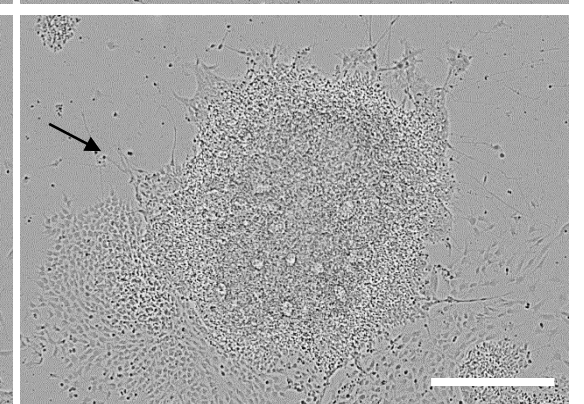



# Supplementary Figure 9

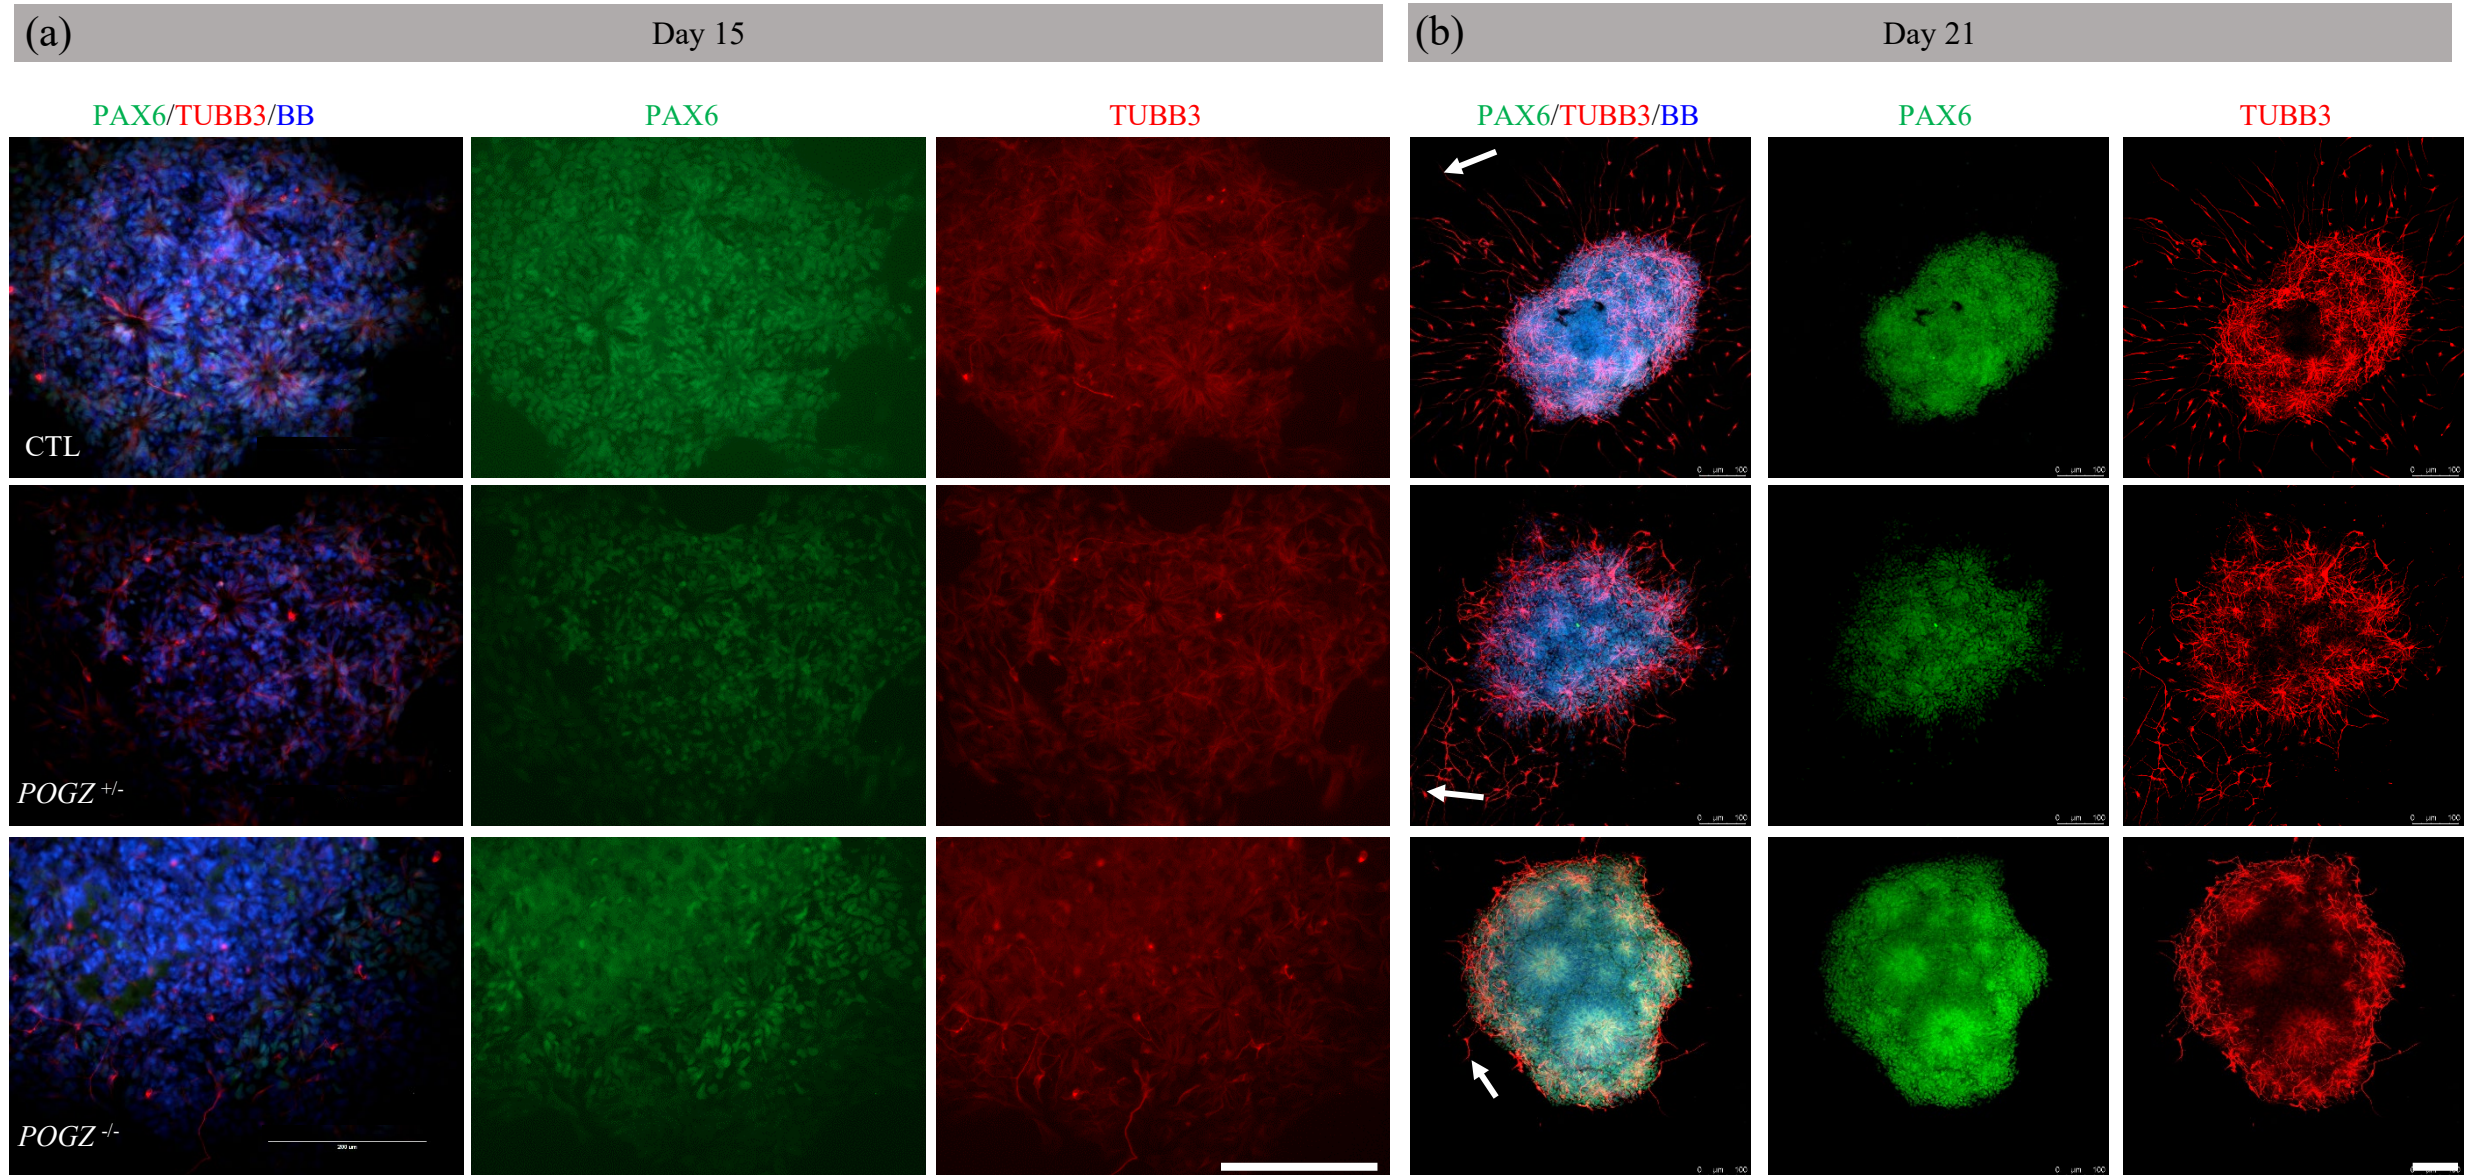

Supplementary Figure 10

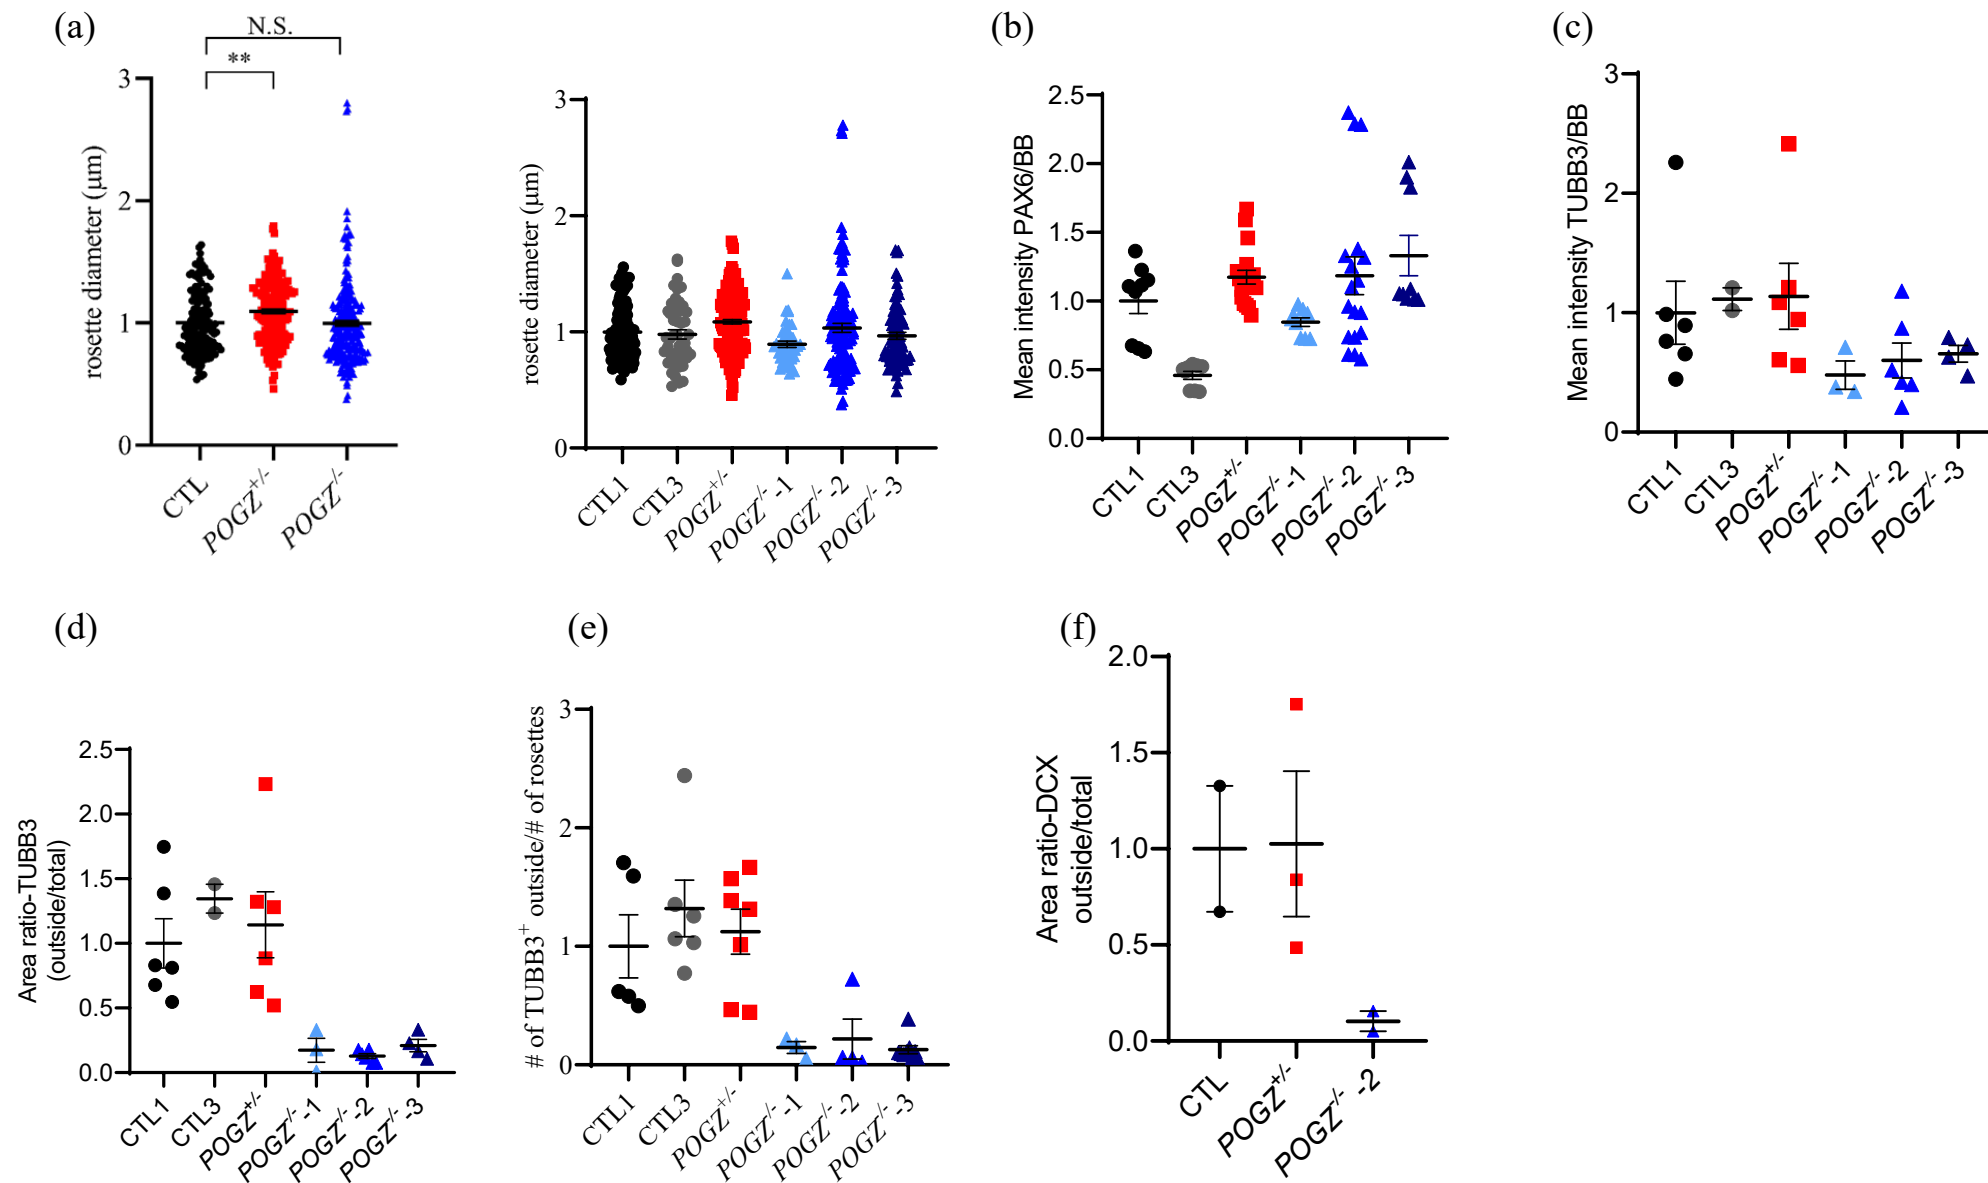

## Supplementary Figure 10

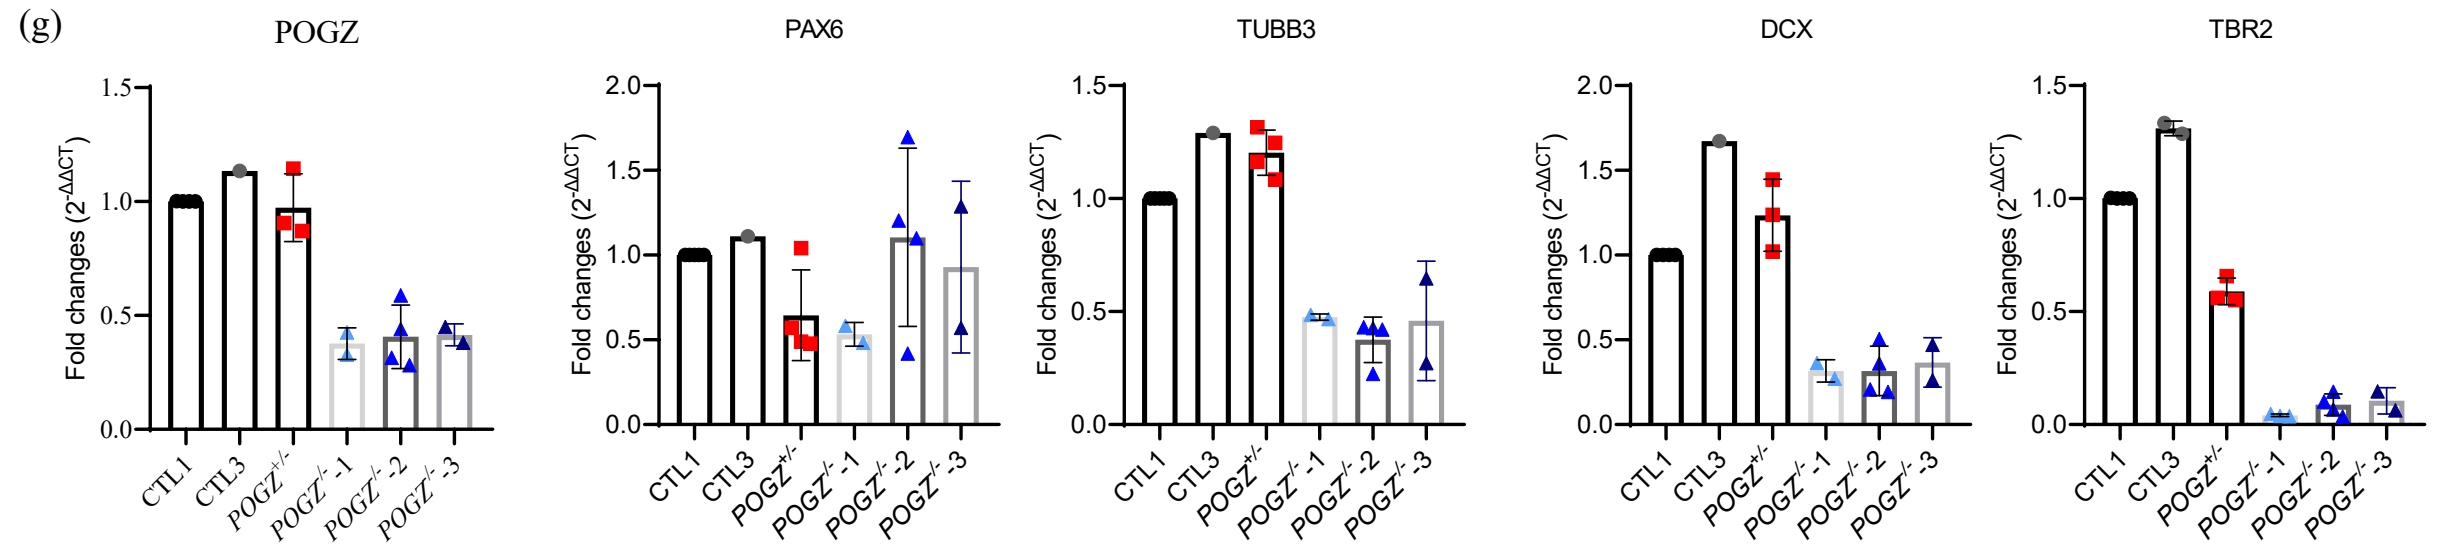



# Supplementary Figure 11

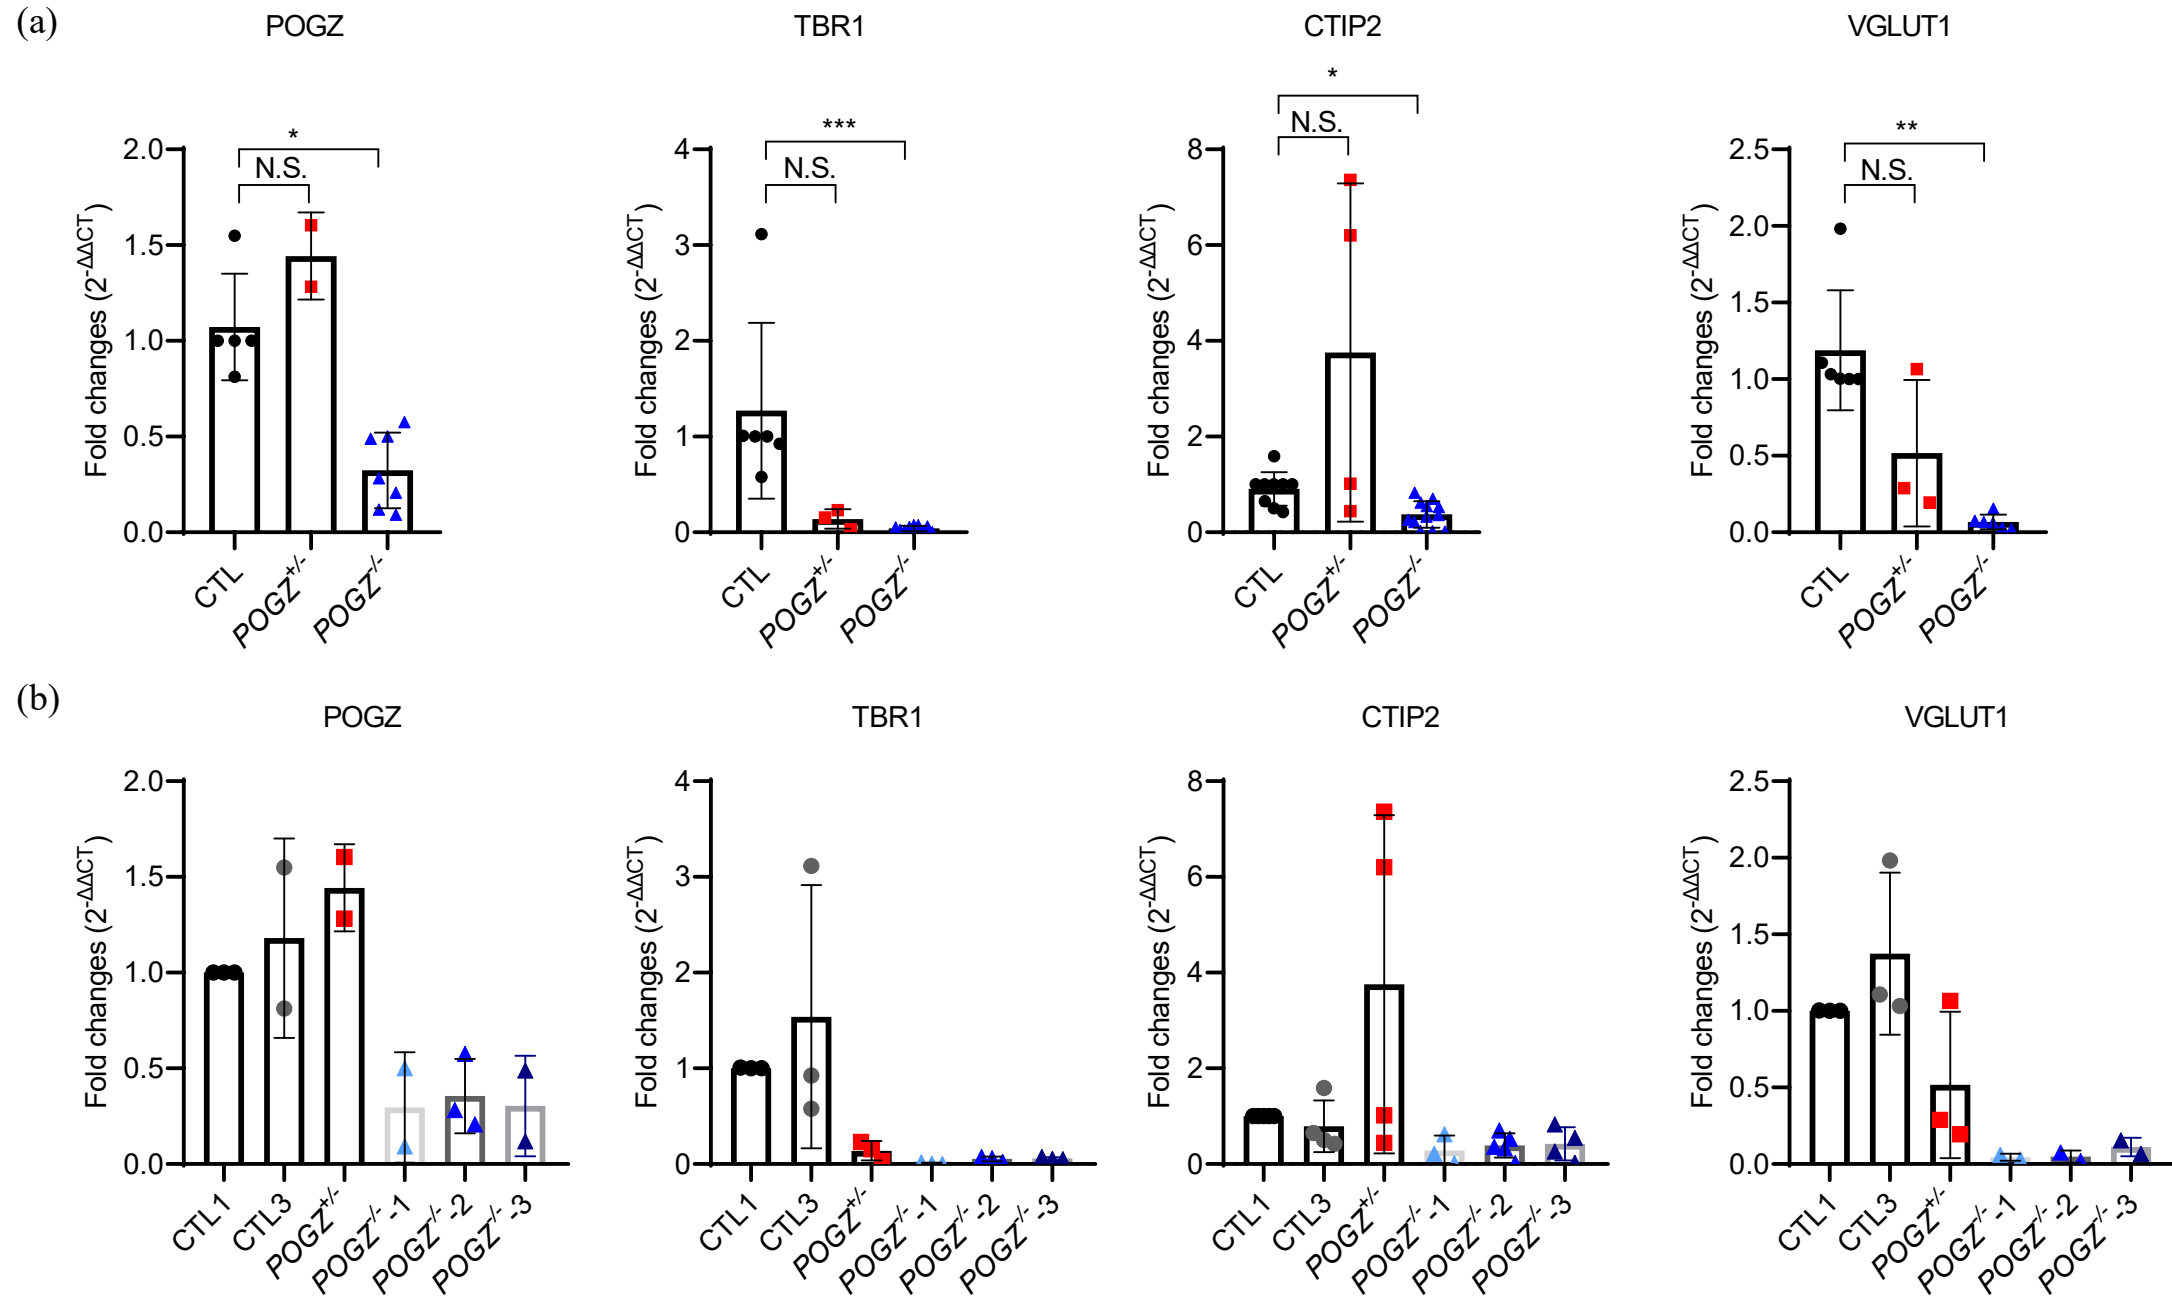

Supplement: NIHMS1838607-supplement-Deng_et_al_Supp_Fig.pdf [file NIHMS1838607-supplement-Deng_et_al_Supp_Fig.pdf]
